# Supplementary material for: Accelerated aging induced by deficiency of Zmpste24 protects old mice to develop bleomycin-induced pulmonary fibrosis
Source: Aging (Albany NY). 2018 Dec 10;10(12):3881–96. doi: 10.18632/aging.101679 (PMC6326652; doi:10.18632/aging.101679)
Supplement: Supplementary Table 1 [file aging-10-101679-s002.xlsx]

## Sheet: Table 1
	Supplementary Table 1
	Top 50 upregulated and down regulated genes in old versus young WT mice
SYMBOL	GENENAME	logFC
Spp1	secreted phosphoprotein 1	3.3
Gpnmb	glycoprotein (transmembrane) nmb	3.3
Saa3	serum amyloid A 3	3.2
Tnc	tenascin C	3.2
Mmp12	matrix metallopeptidase 12	3.2
Sprr1a	small proline-rich protein 1A	3
C3ar1	complement component 3a receptor 1	2.9
Clec4n	C-type lectin domain family 4, member n	2.8
Arg1	arginase, liver	2.8
C1qb	complement component 1, q subcomponent, beta polypeptide	2.7
Ifi204	interferon activated gene 204	2.7
Msr1	macrophage scavenger receptor 1	2.7
Timp1	tissue inhibitor of metalloproteinase 1	2.6
Ccr5	chemokine (C-C motif) receptor 5	2.6
Ccl9	chemokine (C-C motif) ligand 9	2.5
Cd177	CD177 antigen	2.5
Ms4a7	membrane-spanning 4-domains, subfamily A, member 7	2.5
Tlr13	toll-like receptor 13	2.4
Chl1	cell adhesion molecule L1-like	2.4
Clec7a	C-type lectin domain family 7, member a	2.4
Trem2	triggering receptor expressed on myeloid cells 2	2.4
Ccl2	chemokine (C-C motif) ligand 2	2.4
Fcgr1	Fc receptor, IgG, high affinity I	2.3
Rnu3a	U3A small nuclear RNA	2.3
Snord93	small nucleolar RNA, C/D box 93	2.3
Ms4a6d	membrane-spanning 4-domains, subfamily A, member 6D	2.2
Clec5a	C-type lectin domain family 5, member a	2.2
Ch25h	cholesterol 25-hydroxylase	2.2
Ms4a14	membrane-spanning 4-domains, subfamily A, member 14	2.2
Ccl3	chemokine (C-C motif) ligand 3	2.1
Mmp8	matrix metallopeptidase 8	2.1
Itgam	integrin alpha M	2.1
Itgam	integrin alpha M	2.1
Snora64	small nucleolar RNA, H/ACA box 64	2.1
Tnip3	TNFAIP3 interacting protein 3	2.1
Cd68	CD68 antigen	2.1
C1qa	complement component 1, q subcomponent, alpha polypeptide	2.1
C1qc	complement component 1, q subcomponent, C chain	2
Ccr1	chemokine (C-C motif) receptor 1	2
Fcgr4	Fc receptor, IgG, low affinity IV	2
n-R5s136	nuclear encoded rRNA 5S 136	2
Mmp13	matrix metallopeptidase 13	2
Pla2g7	phospholipase A2, group VII (platelet-activating factor acetylhydrolase, plasma)	2
Cxcl13	chemokine (C-X-C motif) ligand 13	2
Ctsk	cathepsin K	2
Wfdc17	WAP four-disulfide core domain 17	2
Cemip	cell migration inducing protein, hyaluronan binding	2
Marco	macrophage receptor with collagenous structure	2
Tgfbi	transforming growth factor, beta induced	2
Slfn9	schlafen 9	1.9
Hamp	hepcidin antimicrobial peptide	-3.9
Car3	carbonic anhydrase 3	-2.6
Chad	chondroadherin	-2.4
Igk	immunoglobulin kappa chain complex	-2
Cyp1a1	cytochrome P450, family 1, subfamily a, polypeptide 1	-1.7
Myoz2	myozenin 2	-1.7
Sln	sarcolipin	-1.7
Actc1	actin, alpha, cardiac muscle 1	-1.7
Muc5b	mucin 5, subtype B, tracheobronchial	-1.6
Igfbp3	insulin-like growth factor binding protein 3	-1.6
Glp1r	glucagon-like peptide 1 receptor	-1.6
Hhip	Hedgehog-interacting protein	-1.6
Ednrb	endothelin receptor type B	-1.6
Aox3	aldehyde oxidase 3	-1.6
Myh6	myosin, heavy polypeptide 6, cardiac muscle, alpha	-1.6
Nr1d1	nuclear receptor subfamily 1, group D, member 1	-1.5
Fendrr	Foxf1 adjacent non-coding developmental regulatory RNA	-1.5
Bpifb1	BPI fold containing family B, member 1	-1.5
Abi3bp	ABI gene family, member 3 (NESH) binding protein	-1.5
Lncppara	long noncoding RNA near Ppara	-1.5
Mirlet7c-2	microRNA let7c-2	-1.5
Fmo1	flavin containing monooxygenase 1	-1.5
Tff2	trefoil factor 2 (spasmolytic protein 1)	-1.4
Clec12b	C-type lectin domain family 12, member B	-1.4
Ecm2	extracellular matrix protein 2, female organ and adipocyte specific	-1.4
Lypd2	Ly6/Plaur domain containing 2	-1.4
Myl7	myosin, light polypeptide 7, regulatory	-1.4
Tnnt2	troponin T2, cardiac	-1.4
Rmdn2	regulator of microtubule dynamics 2	-1.4
Fibin	fin bud initiation factor homolog (zebrafish)	-1.3
Slc7a10	solute carrier family 7 (cationic amino acid transporter, y+ system), member 10	-1.3
Ccdc129	coiled-coil domain containing 129	-1.3
Hspa1a	heat shock protein 1A	-1.3
Ighv1-84	immunoglobulin heavy variable 1-84	-1.3
Klf12	Kruppel-like factor 12	-1.3
Adra1a	adrenergic receptor, alpha 1a	-1.3
Slc5a12	solute carrier family 5 (sodium/glucose cotransporter), member 12	-1.3
Adcy8	adenylate cyclase 8	-1.3
Pdzd2	PDZ domain containing 2	-1.3
Slc4a5	solute carrier family 4, sodium bicarbonate cotransporter, member 5	-1.3
Mir297a-2	microRNA 297a-2	-1.3
Acss1	acyl-CoA synthetase short-chain family member 1	-1.3
Pln	phospholamban	-1.2
Colgalt2	collagen beta(1-O)galactosyltransferase 2	-1.2
Ltbp4	latent transforming growth factor beta binding protein 4	-1.2
Ltbp4	latent transforming growth factor beta binding protein 4	-1.2
Gnao1	guanine nucleotide binding protein, alpha O	-1.2
Mir181b-1	microRNA 181b-1	-1.2
Tbx3os1	T-box 3, opposite strand 1	-1.2
Mir200b	microRNA 200b	-1.2
