# Supplementary material for: Accelerated aging induced by deficiency of Zmpste24 protects old mice to develop bleomycin-induced pulmonary fibrosis
Source: Aging (Albany NY). 2018 Dec 10;10(12):3881–96. doi: 10.18632/aging.101679 (PMC6326652; doi:10.18632/aging.101679)
Supplement: Supplementary Table 2 [file aging-10-101679-s003.xlsx]

## Sheet: Table 2
	Supplementary Table 2
	Top 50 upregulated and down regulated genes in old versus young Zmpste24 deficient mice.
SYMBOL	GENENAME	logFC
Jchain	immunoglobulin joining chain	5.6
Asb2	ankyrin repeat and SOCS box-containing 2	4.9
Igk	immunoglobulin kappa chain complex	4.4
Fancd2os	Fancd2 opposite strand	4
Tnpo3	transportin 3	3.6
Cxcl13	chemokine (C-X-C motif) ligand 13	2.5
Cxcl9	chemokine (C-X-C motif) ligand 9	2.4
Serpina3f	serine (or cysteine) peptidase inhibitor, clade A, member 3F	1.9
Serpina3g	serine (or cysteine) peptidase inhibitor, clade A, member 3G	1.9
Igtp	interferon gamma induced GTPase	1.7
Trav12-2	T cell receptor alpha variable 12-2	1.6
Trav14-1	T cell receptor alpha variable 14-1	1.6
H2-M2	histocompatibility 2, M region locus 2	1.6
Iigp1	interferon inducible GTPase 1	1.5
Spp1	secreted phosphoprotein 1	1.4
Cd274	CD274 antigen	1.3
Cxcl10	chemokine (C-X-C motif) ligand 10	1.3
Gbp2	guanylate binding protein 2	1.3
Sp140	Sp140 nuclear body protein	1.2
Gbp5	guanylate binding protein 5	1.2
Il7r	interleukin 7 receptor	1.1
Irgm2	immunity-related GTPase family M member 2	1.1
BC051142	cDNA sequence BC051142	1.1
Nlrc5	NLR family, CARD domain containing 5	1.1
Gvin1	GTPase, very large interferon inducible 1	1.1
Gvin1	GTPase, very large interferon inducible 1	1.1
Gm4070	predicted gene 4070	1.1
Cxcr6	chemokine (C-X-C motif) receptor 6	1.1
Gvin1	GTPase, very large interferon inducible 1	1.1
Stat4	signal transducer and activator of transcription 4	1.1
Xdh	xanthine dehydrogenase	1
Gbp6	guanylate binding protein 6	1
Ikzf3	IKAROS family zinc finger 3	1
Tnpo3	transportin 3	1
H2-Q4	histocompatibility 2, Q region locus 4	1
Zc3h6	zinc finger CCCH type containing 6	1
Il2rb	interleukin 2 receptor, beta chain	1
Krt4	keratin 4	-4.9
Krt13	keratin 13	-3.4
Sprr3	small proline-rich protein 3	-3.1
Myh1	myosin, heavy polypeptide 1, skeletal muscle, adult	-3
Krtdap	keratinocyte differentiation associated protein	-3
Cnfn	cornifelin	-2.9
Acta1	actin, alpha 1, skeletal muscle	-2.9
Serpinb3a	serine (or cysteine) peptidase inhibitor, clade B (ovalbumin), member 3A	-2.7
Mir664	microRNA 664	-2.3
Snora36b	small nucleolar RNA, H/ACA box 36B	-2.3
Sprr1a	small proline-rich protein 1A	-2.3
Aspn	asporin	-2.3
Gypa	glycophorin A	-2.2
Lor	loricrin	-2.2
H19	H19, imprinted maternally expressed transcript	-2.2
Mir675	microRNA 675	-2.2
Rptn	repetin	-2
Asprv1	aspartic peptidase, retroviral-like 1	-1.9
Nrep	neuronal regeneration related protein	-1.9
Car3	carbonic anhydrase 3	-1.9
Ndnf	neuron-derived neurotrophic factor	-1.8
Defb4	defensin beta 4	-1.8
Col3a1	collagen, type III, alpha 1	-1.8
AF357425	snoRNA AF357425	-1.7
Ckm	creatine kinase, muscle	-1.7
Rgs5	regulator of G-protein signaling 5	-1.7
Mest	mesoderm specific transcript	-1.7
Eln	elastin	-1.7
AF357426	snoRNA AF357426	-1.6
Scarna10	small Cajal body-specific RNA 10	-1.6
Rian	RNA imprinted and accumulated in nucleus	-1.6
Lum	lumican	-1.6
Mylpf	myosin light chain, phosphorylatable, fast skeletal muscle	-1.6
Myot	myotilin	-1.5
Myh8	myosin, heavy polypeptide 8, skeletal muscle, perinatal	-1.5
Ppic	peptidylprolyl isomerase C	-1.5
Rian	RNA imprinted and accumulated in nucleus	-1.5
Kdelr3	KDEL (Lys-Asp-Glu-Leu) endoplasmic reticulum protein retention receptor 3	-1.5
Pygm	muscle glycogen phosphorylase	-1.5
Pygm	muscle glycogen phosphorylase	-1.5
Apobec2	apolipoprotein B mRNA editing enzyme, catalytic polypeptide 2	-1.5
Neb	nebulin	-1.5
Myoz1	myozenin 1	-1.5
Phex	phosphate regulating endopeptidase homolog, X-linked	-1.5
Serpinh1	serine (or cysteine) peptidase inhibitor, clade H, member 1	-1.4
Adamts9	a disintegrin-like and metallopeptidase (reprolysin type) with thrombospondin type 1 motif, 9	-1.4
Mfap4	microfibrillar-associated protein 4	-1.4
Krt5	keratin 5	-1.4
Alox12b	arachidonate 12-lipoxygenase, 12R type	-1.4
AF357355	snoRNA AF357355	-1.4
