# Supplementary material for: Accelerated aging induced by deficiency of Zmpste24 protects old mice to develop bleomycin-induced pulmonary fibrosis
Source: Aging (Albany NY). 2018 Dec 10;10(12):3881–96. doi: 10.18632/aging.101679 (PMC6326652; doi:10.18632/aging.101679)
Supplement: Supplementary Table 3 [file aging-10-101679-s004.xlsx]

## Sheet: Table 5
	Supplemetary Table 3
Intercepted differentially expressed in lungs from old Zmpste24 deficient mice compared with old WT littermates previously compared to their corresponding young counterpart
SYMBOL	GENENAME
Rgs5	regulator of G-protein signaling 5
Mir664	microRNA 664
Snora36b	small nucleolar RNA, H/ACA box 36B
Nrcam	neuronal cell adhesion molecule
Fgfr4	fibroblast growth factor receptor 4
Il7r	interleukin 7 receptor
A530032D15Rik	RIKEN cDNA A530032D15Rik gene
C130026I21Rik	RIKEN cDNA C130026I21 gene
Gm35498	predicted gene, 35498
LOC100041057	sp110 nuclear body protein-like
LOC101055672	nuclear body protein SP140-like
Sp140	Sp140 nuclear body protein
Car3	carbonic anhydrase 3
Sprr1a	small proline-rich protein 1A
Cxcl13	chemokine (C-X-C motif) ligand 13
Prdm8	PR domain containing 8
Spp1	secreted phosphoprotein 1
Cxcl10	chemokine (C-X-C motif) ligand 10
Igk	immunoglobulin kappa chain complex
Slc7a10	solute carrier family 7 (cationic amino acid transporter, y+ system), member 10
