# Supplementary material for: Accelerated aging induced by deficiency of Zmpste24 protects old mice to develop bleomycin-induced pulmonary fibrosis
Source: Aging (Albany NY). 2018 Dec 10;10(12):3881–96. doi: 10.18632/aging.101679 (PMC6326652; doi:10.18632/aging.101679)
Supplement: Supplementary Table 4 [file aging-10-101679-s005.xlsx]

## Sheet: Table 3
	Supplementary Table 4
	Upregulated and downregulated genes in lungs from old bleomycin injured Zmpste24 deficient mice compared with old WT littermates
SYMBOL	GENENAME	logFC
Hamp	hepcidin antimicrobial peptide	3.86937
Tat	tyrosine aminotransferase	2.66945
Omd	osteomodulin	2.44072
Peg3	paternally expressed 3	2.42537
Nr4a1	nuclear receptor subfamily 4, group A, member 1	2.2596
Galnt15	UDP-N-acetyl-alpha-D-galactosamine:polypeptide N-acetylgalactosaminyltransferase 15	2.24872
Sult1d1	sulfotransferase family 1D, member 1	2.24481
Doc2b	double C2, beta	2.15719
Bex4	brain expressed X-linked 4	2.11721
Egr1	early growth response 1	2.05699
Tbx3os1	T-box 3, opposite strand 1	1.96328
Tas2r135	taste receptor, type 2, member 135	1.93574
Fibin	fin bud initiation factor homolog (zebrafish)	1.90598
Gria1	glutamate receptor, ionotropic, AMPA1 (alpha 1)	1.89259
Car3	carbonic anhydrase 3	1.88647
Bpifa1	BPI fold containing family A, member 1	1.87841
Akr1c14	aldo-keto reductase family 1, member C14	1.85579
Snord70	small nucleolar RNA, C/D box 70	1.83496
Tecrl	trans-2,3-enoyl-CoA reductase-like	1.83485
Fgfbp1	fibroblast growth factor binding protein 1	1.82218
Olfr920	olfactory receptor 920	1.81926
Stfa1	stefin A1	1.79525
Rhoj	ras homolog family member J	1.76393
Dcn	decorin	1.72684
Cyp2d22	cytochrome P450, family 2, subfamily d, polypeptide 22	1.71126
Sesn1	sestrin 1	1.66497
Mylip	myosin regulatory light chain interacting protein	1.66016
Igfbp3	insulin-like growth factor binding protein 3	1.61522
Ms4a4d	membrane-spanning 4-domains, subfamily A, member 4D	1.60956
Coro6	coronin 6	1.59817
Ednrb	endothelin receptor type B	1.59741
Igfbp6	insulin-like growth factor binding protein 6	1.55262
Fmo1	flavin containing monooxygenase 1	1.54569
Stfa2l1	stefin A2 like 1	1.53306
Cyp2e1	cytochrome P450, family 2, subfamily e, polypeptide 1	1.53083
Peg3os	Peg3 opposite strand	1.52697
Slc10a6	solute carrier family 10 (sodium/bile acid cotransporter family), member 6	1.51446
Mir145a	microRNA 145a	1.50809
Ifi208	interferon activated gene 208	1.50424
Il1b	interleukin 1 beta	1.47119
Tas2r143	taste receptor, type 2, member 143	1.46488
Aldh6a1	aldehyde dehydrogenase family 6, subfamily A1	1.46347
Glb1l2	galactosidase, beta 1-like 2	1.46287
Apod	apolipoprotein D	1.45335
Sh3d21	SH3 domain containing 21	1.44268
Rasgef1b	RasGEF domain family, member 1B	1.43602
Rasgef1b	RasGEF domain family, member 1B	1.43602
Tnik	TRAF2 and NCK interacting kinase	1.4278
Bex4	brain expressed X-linked 4	1.41109
Cyp3a13	cytochrome P450, family 3, subfamily a, polypeptide 13	1.40264
Nox4	NADPH oxidase 4	1.4018
Bcas3os1	breast carcinoma amplified sequence 3, opposite strand 1	1.39867
Gabre	gamma-aminobutyric acid (GABA) A receptor, subunit epsilon	1.37677
Prkg2	protein kinase, cGMP-dependent, type II	1.36639
Serpina7	serine (or cysteine) peptidase inhibitor, clade A (alpha-1 antiproteinase, antitrypsin), member 7	1.36014
Map3k6	mitogen-activated protein kinase kinase kinase 6	1.35092
Ndrg2	N-myc downstream regulated gene 2	1.32915
Abca8a	ATP-binding cassette, sub-family A (ABC1), member 8a	1.31778
Myl7	myosin, light polypeptide 7, regulatory	1.31147
Frem1	Fras1 related extracellular matrix protein 1	1.30303
Hif3a	hypoxia inducible factor 3, alpha subunit	1.29204
Fkbp5	FK506 binding protein 5	1.27368
Klf15	Kruppel-like factor 15	1.2716
Pfkfb1	6-phosphofructo-2-kinase/fructose-2,6-biphosphatase 1	1.26594
Rorc	RAR-related orphan receptor gamma	1.26497
Mettl7a3	methyltransferase like 7A3	1.2518
Fmo2	flavin containing monooxygenase 2	1.24736
Mir126a	microRNA 126a	1.24219
Arrdc3	arrestin domain containing 3	1.23759
Tgfbr3	transforming growth factor, beta receptor III	1.22522
Snhg3	small nucleolar RNA host gene 3	1.22444
Mir701	microRNA 701	1.21778
Gulp1	GULP, engulfment adaptor PTB domain containing 1	1.21178
Olfr1392	olfactory receptor 1392	1.21023
Mir3061	microRNA 3061	1.20776
Slc38a4	solute carrier family 38, member 4	1.20638
Srp54c	signal recognition particle 54C	1.20416
Cytl1	cytokine-like 1	1.20133
Lmcd1	LIM and cysteine-rich domains 1	1.19769
Tnnt2	troponin T2, cardiac	1.19649
Spry4	sprouty homolog 4 (Drosophila)	1.19263
Cyp1a1	cytochrome P450, family 1, subfamily a, polypeptide 1	1.192
Snord82	small nucleolar RNA, C/D box 82	1.18677
Tipin	timeless interacting protein	1.18505
Sumo3	small ubiquitin-like modifier 3	1.17911
Prdm5	PR domain containing 5	1.16254
Atp6v0a4	ATPase, H+ transporting, lysosomal V0 subunit A4	1.1615
Neat1	nuclear paraspeckle assembly transcript 1 (non-protein coding)	1.1614
Mir27a	microRNA 27a	1.15609
Upk1a	uroplakin 1A	1.14982
Snhg3	small nucleolar RNA host gene 3	1.14844
Arxes2	adipocyte-related X-chromosome expressed sequence 2	1.14802
Fgf7	fibroblast growth factor 7	1.14525
Kyat3	kynurenine aminotransferase 3	1.14142
Cxcl14	chemokine (C-X-C motif) ligand 14	1.13944
Rad18	RAD18 E3 ubiquitin protein ligase	1.13914
Cd46	CD46 antigen, complement regulatory protein	1.13307
Tas2r126	taste receptor, type 2, member 126	1.13091
Slc43a1	solute carrier family 43, member 1	1.13026
Myrip	myosin VIIA and Rab interacting protein	1.12996
Btg2	B cell translocation gene 2, anti-proliferative	1.12727
Cfd	complement factor D (adipsin)	1.12234
Tmod1	tropomodulin 1	1.11148
Ppp2r3a	protein phosphatase 2, regulatory subunit B'', alpha	1.11032
Gria3	glutamate receptor, ionotropic, AMPA3 (alpha 3)	1.10619
Amy1	amylase 1, salivary	1.10503
Lamc3	laminin gamma 3	1.09987
Sik1	salt inducible kinase 1	1.0987
Mir103-2	microRNA 103-2	1.09367
Pde9a	phosphodiesterase 9A	1.09076
C1qtnf7	C1q and tumor necrosis factor related protein 7	1.08014
Npr3	natriuretic peptide receptor 3	1.07977
Ppp1r2	protein phosphatase 1, regulatory (inhibitor) subunit 2	1.07154
Acss3	acyl-CoA synthetase short-chain family member 3	1.07027
Mchr1	melanin-concentrating hormone receptor 1	1.06721
Cnih2	cornichon family AMPA receptor auxiliary protein 2	1.06354
Pln	phospholamban	1.06246
Nqo1	NAD(P)H dehydrogenase, quinone 1	1.06238
Upk1b	uroplakin 1B	1.06125
Dusp1	dual specificity phosphatase 1	1.06087
Hsd11b1	hydroxysteroid 11-beta dehydrogenase 1	1.06024
Srp54a	signal recognition particle 54A	1.05617
Srp54b	signal recognition particle 54B	1.05617
Srp54c	signal recognition particle 54C	1.05617
Abcg2	ATP-binding cassette, sub-family G (WHITE), member 2	1.0537
Mir3066	microRNA 3066	1.04942
Fos	FBJ osteosarcoma oncogene	1.04894
Srp54a	signal recognition particle 54A	1.04494
Srp54b	signal recognition particle 54B	1.04494
Srp54c	signal recognition particle 54C	1.04494
Fap	fibroblast activation protein	1.04466
Akap7	A kinase (PRKA) anchor protein 7	1.04383
Eppin	epididymal peptidase inhibitor	1.03435
Glb1l3	galactosidase, beta 1 like 3	1.03181
Agtr1a	angiotensin II receptor, type 1a	1.03123
Ttc6	tetratricopeptide repeat domain 6	1.03078
Il1r2	interleukin 1 receptor, type II	1.02856
Inca1	inhibitor of CDK, cyclin A1 interacting protein 1	1.02548
Lrtm2	leucine-rich repeats and transmembrane domains 2	1.02425
Arrdc2	arrestin domain containing 2	1.0217
Akap5	A kinase (PRKA) anchor protein 5	1.02141
Aff3	AF4/FMR2 family, member 3	1.02086
Ccdc152	coiled-coil domain containing 152	1.00984
Nr4a2	nuclear receptor subfamily 4, group A, member 2	1.00927
Slf1	SMC5-SMC6 complex localization factor 1	1.00742
Dbt	dihydrolipoamide branched chain transacylase E2	1.00565
Cnep1r1	CTD nuclear envelope phosphatase 1 regulatory subunit 1	0.999461
Gdpd2	glycerophosphodiester phosphodiesterase domain containing 2	0.997554
Usp54	ubiquitin specific peptidase 54	0.995748
Aplnr	apelin receptor	0.995645
Saa3	serum amyloid A 3	-4.3458
Tnpo3	transportin 3	-4.01056
Rnase2a	ribonuclease, RNase A family, 2A (liver, eosinophil-derived neurotoxin)	-3.84047
Mmp12	matrix metallopeptidase 12	-3.72075
Itgax	integrin alpha X	-2.95083
Mid1	midline 1	-2.86768
Ly6i	lymphocyte antigen 6 complex, locus I	-2.71747
Awat1	acyl-CoA wax alcohol acyltransferase 1	-2.71131
Zmpste24	zinc metallopeptidase, STE24	-2.65066
Fancd2os	Fancd2 opposite strand	-2.62219
Ccl3	chemokine (C-C motif) ligand 3	-2.61534
Fancd2os	Fancd2 opposite strand	-2.57562
Itih4	inter alpha-trypsin inhibitor, heavy chain 4	-2.48233
Slc26a4	solute carrier family 26, member 4	-2.42169
Ms4a7	membrane-spanning 4-domains, subfamily A, member 7	-2.41707
H2-M2	histocompatibility 2, M region locus 2	-2.38604
Olr1	oxidized low density lipoprotein (lectin-like) receptor 1	-2.29533
H2-Ab1	histocompatibility 2, class II antigen A, beta 1	-2.28676
Ccl9	chemokine (C-C motif) ligand 9	-2.28566
Olfr111	olfactory receptor 111	-2.28317
Lgals1	lectin, galactose binding, soluble 1	-2.27218
Oas2	2'-5' oligoadenylate synthetase 2	-2.25229
Clec4n	C-type lectin domain family 4, member n	-2.22693
Il1a	interleukin 1 alpha	-2.20609
Serpina3f	serine (or cysteine) peptidase inhibitor, clade A, member 3F	-2.17935
Serpina3g	serine (or cysteine) peptidase inhibitor, clade A, member 3G	-2.17935
Marco	macrophage receptor with collagenous structure	-2.16078
Gpnmb	glycoprotein (transmembrane) nmb	-2.16026
Slamf7	SLAM family member 7	-2.15803
Ctsk	cathepsin K	-2.14789
Mir147	microRNA 147	-2.09031
Top2a	topoisomerase (DNA) II alpha	-2.03634
Fgg	fibrinogen gamma chain	-2.01908
Mmp19	matrix metallopeptidase 19	-2.01127
Ccl6	chemokine (C-C motif) ligand 6	-1.97279
Arg1	arginase, liver	-1.96901
Orm2	orosomucoid 2	-1.9543
Erdr1	erythroid differentiation regulator 1	-1.95264
Mki67	antigen identified by monoclonal antibody Ki 67	-1.94606
Bcl2a1a	B cell leukemia/lymphoma 2 related protein A1a	-1.94556
Bcl2a1b	B cell leukemia/lymphoma 2 related protein A1b	-1.94556
Bcl2a1d	B cell leukemia/lymphoma 2 related protein A1d	-1.94556
Ch25h	cholesterol 25-hydroxylase	-1.91689
Ccl22	chemokine (C-C motif) ligand 22	-1.91667
Pigr	polymeric immunoglobulin receptor	-1.9084
Bcl2a1a	B cell leukemia/lymphoma 2 related protein A1a	-1.90028
Bcl2a1b	B cell leukemia/lymphoma 2 related protein A1b	-1.90028
Cd72	CD72 antigen	-1.89475
Hexa	hexosaminidase A	-1.8944
Ccr5	chemokine (C-C motif) receptor 5	-1.8804
Ect2	ect2 oncogene	-1.8564
Ccl17	chemokine (C-C motif) ligand 17	-1.85167
Hist1h2ab	histone cluster 1, H2ab	-1.84553
Scn3b	sodium channel, voltage-gated, type III, beta	-1.82334
Slc6a20a	solute carrier family 6 (neurotransmitter transporter), member 20A	-1.8229
Pisd-ps3	phosphatidylserine decarboxylase, pseudogene 3	-1.81884
Ccl5	chemokine (C-C motif) ligand 5	-1.79436
Cfb	complement factor B	-1.79372
H2-Eb1	histocompatibility 2, class II antigen E beta	-1.79329
Cd74	CD74 antigen (invariant polypeptide of major histocompatibility complex, class II antigen-associated)	-1.78939
Mir5107	microRNA 5107	-1.78939
Nlrp1c-ps	NLR family, pyrin domain containing 1C, pseudogene	-1.78828
Cybb	cytochrome b-245, beta polypeptide	-1.78682
Il2rg	interleukin 2 receptor, gamma chain	-1.7732
Orm1	orosomucoid 1	-1.77119
Ccl12	chemokine (C-C motif) ligand 12	-1.76829
Erdr1	erythroid differentiation regulator 1	-1.75787
Ccl21a	chemokine (C-C motif) ligand 21A (serine)	-1.74981
Ccl21b	chemokine (C-C motif) ligand 21B (leucine)	-1.74981
Ccl21c	chemokine (C-C motif) ligand 21C (leucine)	-1.74981
Atp6v0d2	ATPase, H+ transporting, lysosomal V0 subunit D2	-1.7446
Spp1	secreted phosphoprotein 1	-1.73531
Csf2rb2	colony stimulating factor 2 receptor, beta 2, low-affinity (granulocyte-macrophage)	-1.72551
Rnase2b	ribonuclease, RNase A family, 2B (liver, eosinophil-derived neurotoxin)	-1.71854
Thy1	thymus cell antigen 1, theta	-1.7159
Timp1	tissue inhibitor of metalloproteinase 1	-1.71393
Itgb2	integrin beta 2	-1.70373
Il33	interleukin 33	-1.69905
Lrp2	low density lipoprotein receptor-related protein 2	-1.68287
Ccl21a	chemokine (C-C motif) ligand 21A (serine)	-1.68259
Il1rn	interleukin 1 receptor antagonist	-1.68019
Ctsd	cathepsin D	-1.67778
Mcoln3	mucolipin 3	-1.6602
Mmp13	matrix metallopeptidase 13	-1.65866
Cxcr1	chemokine (C-X-C motif) receptor 1	-1.65794
H2-DMb2	histocompatibility 2, class II, locus Mb2	-1.65377
Ulbp1	UL16 binding protein 1	-1.65237
Tmem252	transmembrane protein 252	-1.65155
Adgre1	adhesion G protein-coupled receptor E1	-1.64928
Cd200r1	CD200 receptor 1	-1.64251
Col3a1	collagen, type III, alpha 1	-1.63832
Tfec	transcription factor EC	-1.6382
Lrp12	low density lipoprotein-related protein 12	-1.63395
Cdk19	cyclin-dependent kinase 19	-1.63387
F7	coagulation factor VII	-1.63206
Trav14d-3-dv8	T cell receptor alpha variable 14D-3-DV8	-1.632
Trav6d-6	T cell receptor alpha variable 6D-6	-1.632
Trav7-4	T cell receptor alpha variable 7-4	-1.632
Trav9d-3	T cell receptor alpha variable 9D-3	-1.632
Trav9d-4	T cell receptor alpha variable 9D-4	-1.632
Saa4	serum amyloid A 4	-1.62612
Serpinb1a	serine (or cysteine) peptidase inhibitor, clade B, member 1a	-1.62247
P2ry6	pyrimidinergic receptor P2Y, G-protein coupled, 6	-1.59651
Trem2	triggering receptor expressed on myeloid cells 2	-1.59089
Ctss	cathepsin S	-1.59042
Hc	hemolytic complement	-1.58201
Cd68	CD68 antigen	-1.57977
Mir28c	microRNA 28c	-1.57331
Fn1	fibronectin 1	-1.56947
Slc7a11	solute carrier family 7 (cationic amino acid transporter, y+ system), member 11	-1.55721
Mrc1	mannose receptor, C type 1	-1.54121
Col1a1	collagen, type I, alpha 1	-1.53841
Ly75	lymphocyte antigen 75	-1.53169
Steap4	STEAP family member 4	-1.53071
Kcnn3	potassium intermediate/small conductance calcium-activated channel, subfamily N, member 3	-1.52818
Anpep	alanyl (membrane) aminopeptidase	-1.52039
Rasgrp3	RAS, guanyl releasing protein 3	-1.51644
Adgre4	adhesion G protein-coupled receptor E4	-1.51038
Ms4a14	membrane-spanning 4-domains, subfamily A, member 14	-1.50462
Cxcl9	chemokine (C-X-C motif) ligand 9	-1.50363
Klk13	kallikrein related-peptidase 13	-1.49394
Slc5a1	solute carrier family 5 (sodium/glucose cotransporter), member 1	-1.49086
Ndc80	NDC80 kinetochore complex component	-1.49018
Psap	prosaposin	-1.48491
Acp5	acid phosphatase 5, tartrate resistant	-1.48449
C3ar1	complement component 3a receptor 1	-1.48422
Tmem173	transmembrane protein 173	-1.47956
Cd200r4	CD200 receptor 4	-1.47398
Hist1h2af	histone cluster 1, H2af	-1.47284
Cyth4	cytohesin 4	-1.47042
Ms4a6d	membrane-spanning 4-domains, subfamily A, member 6D	-1.46924
Ifi203	interferon activated gene 203	-1.46618
Gbp8	guanylate-binding protein 8	-1.46104
Myo1g	myosin IG	-1.45603
Tff2	trefoil factor 2 (spasmolytic protein 1)	-1.45294
Prc1	protein regulator of cytokinesis 1	-1.45279
Vnn1	vanin 1	-1.45268
Lgi2	leucine-rich repeat LGI family, member 2	-1.44797
Vwf	Von Willebrand factor	-1.44794
Igf1	insulin-like growth factor 1	-1.44605
H2-Aa	histocompatibility 2, class II antigen A, alpha	-1.4456
Tmem106a	transmembrane protein 106A	-1.44417
Tm4sf19	transmembrane 4 L six family member 19	-1.44186
Cd3e	CD3 antigen, epsilon polypeptide	-1.43548
Col6a3	collagen, type VI, alpha 3	-1.43376
C4b	complement component 4B (Chido blood group)	-1.42857
Pld3	phospholipase D family, member 3	-1.42458
Clec7a	C-type lectin domain family 7, member a	-1.41867
Chil1	chitinase-like 1	-1.41472
