# Supplementary material for: Accelerated aging induced by deficiency of Zmpste24 protects old mice to develop bleomycin-induced pulmonary fibrosis
Source: Aging (Albany NY). 2018 Dec 10;10(12):3881–96. doi: 10.18632/aging.101679 (PMC6326652; doi:10.18632/aging.101679)
Supplement: Supplementary Table 5 [file aging-10-101679-s006.xlsx]

## Sheet: Table 4
	Supplemetary Table 5
MicroRNAs differentially expressed in lungs from old bleomycin injured Zmpste24 deficient mice compared with old WT littermates
SYMBOL	GENENAME	logFC
Mir145a	microRNA 145a	1.5
Mir126a	microRNA 126a	1.24
Mir701	microRNA 701	1.21
Mir3061	microRNA 3061	1.2
Mir27a	microRNA 27a	1.15
Mir103-2	microRNA 103-2	1.09
Mir3066	microRNA 3066	1.04
Mir5119	microRNA 5119	0.98
Mir452	microRNA 452	0.96
Mir10a	microRNA 10a	0.95
Mir491	microRNA 491	0.88
Mir23a	microRNA 23a	0.87
Mir30c-2	microRNA 30c-2	0.87
Mir29a	microRNA29a	0.82
Mir703	microRNA 703	0.82
Mir1946b	microRNA 1946b	0.79
Mir1192	microRNA 1192	0.74
Mir24-2	microRNA 24-2	0.65
Mir101a	microRNA 101a	0.64
Mir694	microRNA 694	0.63
Mir677	microRNA 677	0.59
Mir677	microRNA 677	0.59
Mir1938	microRNA 1938	0.58
Mir147	microRNA 147	-2.09
Mir5107	microRNA 5107	-1.78
Mir28c	microRNA 28c	-1.57
Mir511	microRNA 511	-1.07
Mir704	microRNA 704	-0.95
Mir1907	microRNA 1907	-0.74
Mir331	microRNA 331	-0.7
Mir678	microRNA 678	-0.67
Mir342	microRNA 342	-0.64
Mir702	microRNA 702	-0.62
Mir8104	microRNA 8104	-0.62
Mir344d-1	microRNA 344d-1	-0.6
Mir5134	microRNA 5134	-0.56
Mir3076	microRNA 3076	-0.55
Mir1912	microRNA 1912	-0.53
Mir5103	microRNA 5103	-0.53
Mir31	microRNA 31	-0.52
Mir5046	microRNA 5046	-0.52
Mir692-2	microRNA 692-2	-0.51
Mir692-3	microRNA 692-3	-0.51
